# Supplementary material for: Development of a theory-informed questionnaire to assess the acceptability of healthcare interventions
Source: BMC Health Serv Res. 2022 Mar 1;22:279. doi: 10.1186/s12913-022-07577-3 (PMC8887649; doi:10.1186/s12913-022-07577-3)
Supplement: Supplementary file 4 — Additional file 4. [file 12913_2022_7577_MOESM4_ESM.docx]

**Supplementary file 4: Version 1 of the TFA informed acceptability questionnaire and version 2 of the TFA informed acceptability questionnaire applied in the process evaluation phase of the AFFINITIE research programme**.

|  | V1 | V2 applied in AFFINITIE trial |
| --- | --- | --- |
| Global acceptability | To what extend did you find the PBM elective audit materials acceptable?   | Completely unacceptable | Unacceptable | No opinion | Acceptable | Completely acceptable | | --- | --- | --- | --- | --- | | 1 | **2** | **3** | **4** | **5** | | The feedback materials were acceptable:   | Strongly disagree | Disagree | No opinion | Agree | Strongly agree | | --- | --- | --- | --- | --- | | 1 | **2** | **3** | **4** | **5** | |
| Affective attitude  *How an individual feel about the intervention* | Did you like reading the feedback materials?   | Strongly dislike | Dislike | No opinion | Like | Strongly like | | --- | --- | --- | --- | --- | | 1 | **2** | **3** | **4** | **5** | | The feedback materials were interesting to read:   | Strongly disagree | Disagree | No opinion | Agree | Strongly agree | | --- | --- | --- | --- | --- | | 1 | **2** | **3** | **4** | **5** | |
| Burden  *The amount of effort that was required to participate in the intervention* | How much effort did it take you to read the materials?   | No effort at all | A little effort | Same effort | A lot of effort | Huge effort | | --- | --- | --- | --- | --- | | 1 | **2** | **3** | **4** | **5** | | It required effort for me to read the feedback materials:   | Strongly disagree | Disagree | No opinion | Agree | Strongly agree | | --- | --- | --- | --- | --- | | 1 | **2** | **3** | **4** | **5** | |
| Ethicality  *The extent to which the intervention has good fit with an individual’s value system* | Are there any other moral or ethical consequences of the materials?   | Substantial negative  consequences | Negative consequences | No consequences | Positive consequences | Substantial positive consequences | | --- | --- | --- | --- | --- | | 1 | **2** | **3** | **4** | **5** |   Please tell us more about your views | There are moral or ethical consequences to the feedback materials:   | Strongly disagree | Disagree | No Opinion | Agree | Strongly agree | | --- | --- | --- | --- | --- | | 1 | **2** | **3** | **4** | **5** | |
| Perceived Effectiveness  *The extent to which the intervention is perceived to have achieved its intended purpose* | How effective were the feedback materials in supporting improvements in patient care?   | Not at all effective | Ineffective | No Opinion | Effective | Very effective | | --- | --- | --- | --- | --- | | 1 | **2** | **3** | **4** | **5** | | The feedback materials are likely to improve patient care:   | Strongly disagree | Disagree | No Opinion | Agree | Strongly agree | | --- | --- | --- | --- | --- | | 1 | **2** | **3** | **4** | **5** | |
| Opportunity costs  *the benefits, profits or values that were given up to engage in the intervention* | Did reading the feedback materials interfere with your other priorities?   | Strongly disagree | Disagree | No Opinion | Agree | Strongly agree | | --- | --- | --- | --- | --- | | 1 | **2** | **3** | **4** | **5** | | Reading the feedback materials interfered with my other priorities:   | Strongly disagree | Disagree | No Opinion | Agree | Strongly agree | | --- | --- | --- | --- | --- | | 1 | **2** | **3** | **4** | **5** | |
| Self-efficacy  *The participant's confidence that they can perform the behaviour(s) required to participate in the intervention* | How confident are you that you can identify the most relevant information for your hospital from the feedback materials?   | Very unconfident | Unconfident | No opinion | Confident | Very confident | | --- | --- | --- | --- | --- | | 1 | **2** | **3** | **4** | **5** | | I am confident that I can identify the most relevant information for my site from the feedback materials:   | Very unconfident | Unconfident | No opinion | Confident | Very confident | | --- | --- | --- | --- | --- | | 1 | **2** | **3** | **4** | **5** | |
| Intervention coherence  *The extent to which the participant understands the intervention and how it works* | It makes sense to me how the feedback materials will result in improvements in patient care:   | Strongly disagree | Disagree | No opinion | Agree | Strongly agree | | --- | --- | --- | --- | --- | | 1 | **2** | **3** | **4** | **5** |   Please tell us more about your views | It makes sense to me how the feedback materials will result in improvements in patient care:   | Strongly disagree | Disagree | No opinion | Agree | Strongly agree | | --- | --- | --- | --- | --- | | 1 | **2** | **3** | **4** | **5** |   Please tell us more about your views |
|  | If you have any additional thoughts regarding the feedback materials, please can you write them here: | If you have any additional thoughts regarding the feedback materials, please can you write them here: |
